# Supplementary material for: Optimization of Lipid Nanoparticles for saRNA Expression and Cellular Activation Using a Design-of-Experiment Approach
Source: PubMed Central journal article supplement — Mol Pharm. 2022 May 23;19(6):1892–905. doi: 10.1021/acs.molpharmaceut.2c00032 (PMC9176215; doi:10.1021/acs.molpharmaceut.2c00032), 2022-05-23
Supplement: mp2c00032_si_001.pdf [file mp2c00032_si_001.pdf]

## **Supplementary Information: Optimization of Lipid Nanoparticles for saRNA Expression and Cellular Activation Using a Design-of-Experiment Approach**

Han Han Ly<sup>1, ‡</sup>, Simon Daniel<sup>2, ‡</sup>, Shekinah K. V. Soriano<sup>1</sup>, Zoltán Kis<sup>2,3</sup>, Anna K. Blakney<sup>1,\*</sup>

1. Michael Smith Laboratories, School of Biomedical Engineering, University of British Columbia, Vancouver, BC, V6T 1Z4 Canada
2. Department of Chemical Engineering, Imperial College London, London, SW7 2BX United Kingdom
3. Department of Chemical and Biological Engineering, University of Sheffield, Sheffield, S10 2TN, United Kingdom

<sup>‡</sup>Note: these authors contributed equally to this work.

\*Corresponding author. Email: [anna.blakney@mssl.ubc.ca](mailto:anna.blakney@mssl.ubc.ca)

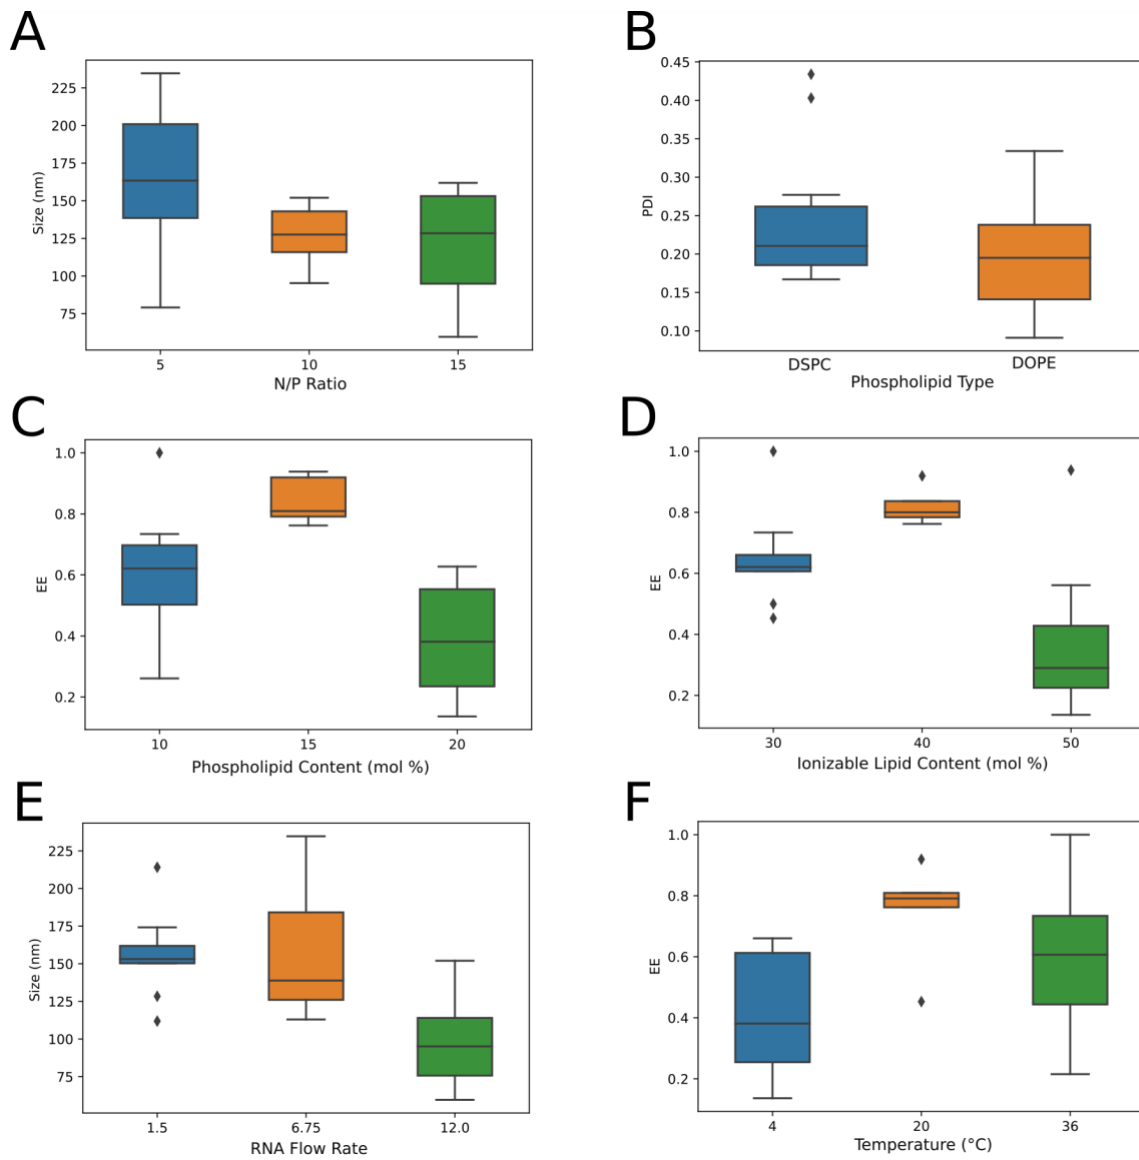

**Supplementary Figure 1:** Multiple pairwise analysis for variable selection. Boxplot (A-F) from Definite Screening Design of experiments (Iteration A). Only statistically significant interactions between experimental inputs and outputs (see Figure 2C in main text) are displayed.

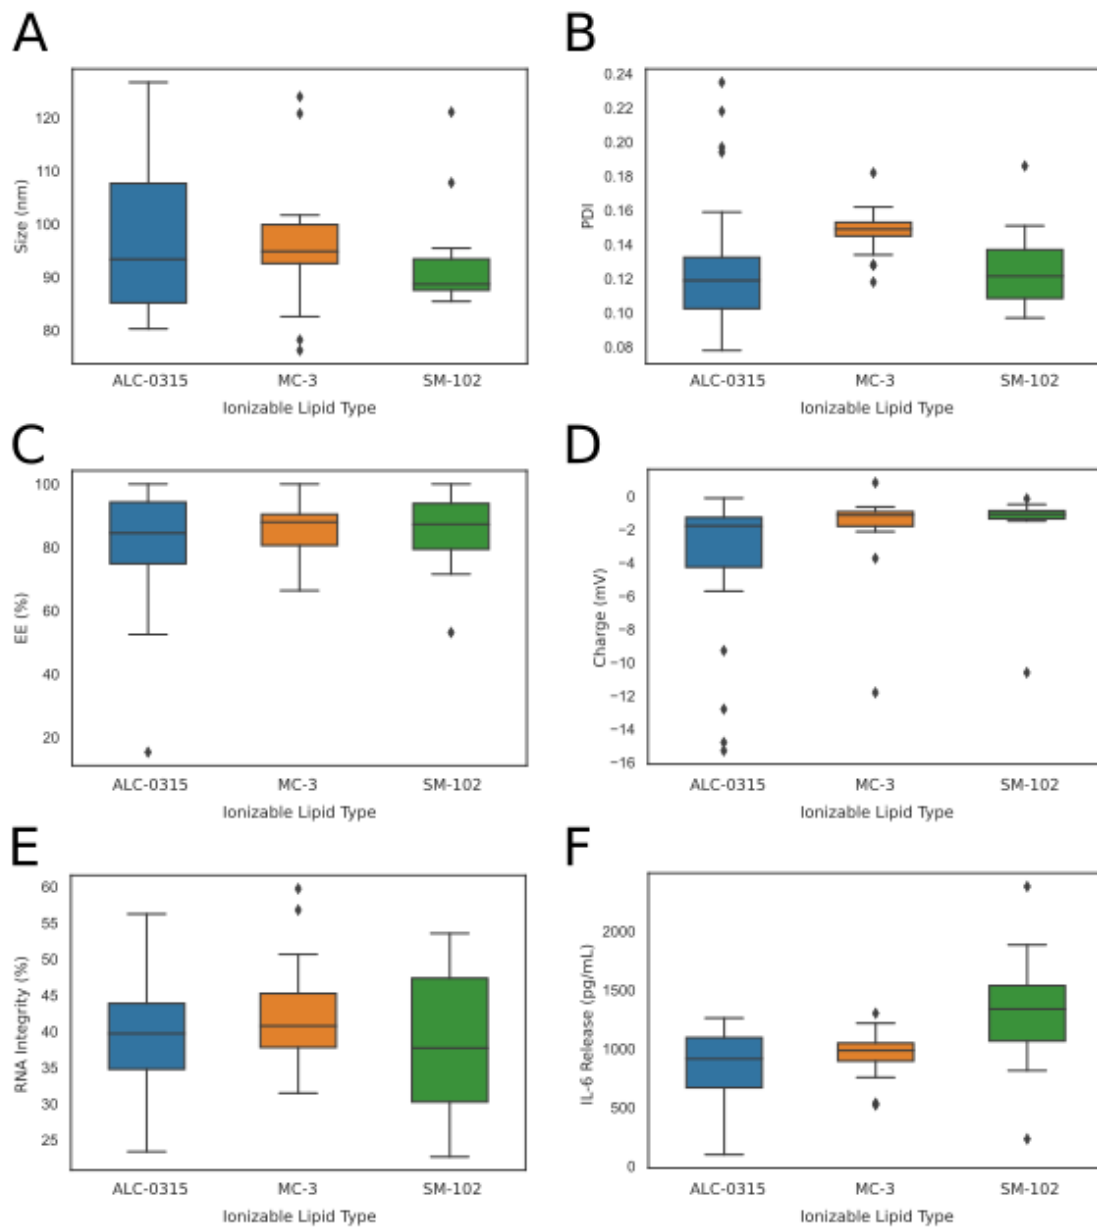

**Supplementary Figure 2:** Multiple pairwise analysis for the effect of the Ionizable lipid type on critical quality attributes. Boxplot (A-F) from Box-Behnken Design of experiments (Iteration B).

**A**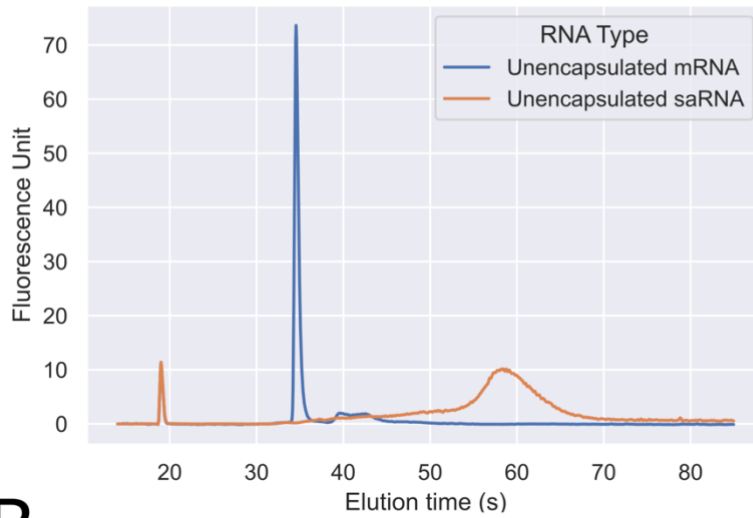**B**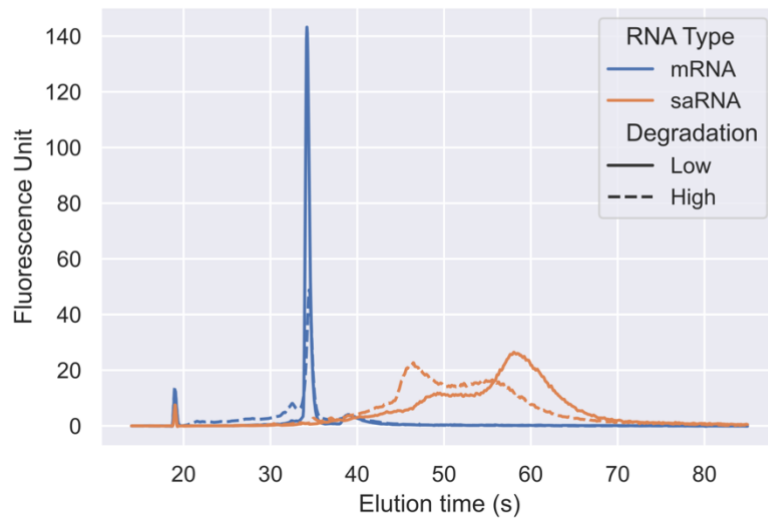

**Supplementary Figure 3:** RNA electropherogram raw data (Bioanalyzer 100) from 6 typical samples. Electropherograms from unencapsulated RNA species (**A**) and LNP-encapsulated RNA (**B**) are displayed. The assessed RNA Integrity values from saRNA samples are : 65.7 % (unencapsulated), (59,7 % (low degradation) and 23.4% (high degradation). The assessed values from mRNA samples are: 76.4% (unencapsulated), 71.1 % (low degradation) and 38.6 % (high degradation).

**Explanatory coded variable for Supplementary Table 1-6:**

X1 : Ionizable Lipid Content

X2 : pH

X3 : Phospholipid content

X4 : Ionizable lipid pKa

**Supplementary Table 1:** Response surface methodology results for LNP size (nm) based on polynomial Ordinary Least Square (OLS) regression

| Variable                  | Parameter Estimate | Standard Error | t-value | p-value |
|---------------------------|--------------------|----------------|---------|---------|
| <b>Intercept</b>          | 103.2706           | 2.817          | 36.661  | 0.000*  |
| <b>Main effect</b>        |                    |                |         |         |
| X1                        | 1.0945             | 1.739          | 0.630   | 0.542   |
| X2                        | -9.0928            | 1.739          | - 5.230 | 0.000*  |
| X3                        | 2.7043             | 1.739          | 1.555   | 0.148   |
| X4                        | -4.6421            | 1.408          | -3.296  | 0.007*  |
| <b>Interaction effect</b> |                    |                |         |         |
| X1*X2                     | 5.4333             | 2.519          | 2.157   | 0.054   |
| X1*X3                     | 2.0842             | 2.519          | 0.827   | 0.426   |
| X1*X4                     | -3.1026            | 1.905          | -1.629  | 0.132   |
| X2*X3                     | 1.5675             | 2.519          | 0.622   | 0.547   |
| X2*X4                     | -2.2317            | 1.905          | -1.172  | 0.26    |
| X3*X4                     | -1.2573            | 1.905          | -0.660  | 0.523   |
| <b>Quadratic effect</b>   |                    |                |         |         |
| X1                        | -6.4066            | 2.412          | 2.656   | 0.022*  |
| X2                        | -1.2791            | 2.412          | -0.530  | 0.606   |
| X3                        | -7.3360            | 2.412          | -3.041  | 0.011*  |
| X4                        | -1.2573            | 1.905          | -0.660  | 0.523   |

*R-Squared= 0.862 ; Prob (F-statistic): 0.00586*

**Supplementary Table 2:** Response surface methodology results for Encapsulation Efficiency (%) based on polynomial Ordinary Least Square (OLS) regression

| Variable                  | Parameter Estimate | Standard Error | t-value | p-value |
|---------------------------|--------------------|----------------|---------|---------|
| <b>Intercept</b>          | 89.1689            | 2.796          | 31.889  | 0.000   |
| <b>Main effect</b>        |                    |                |         |         |
| X1                        | -5.7937            | 1.726          | -3.357  | 0.006   |
| X2                        | -0.0899            | 1.726          | -0.052  | 0.959   |
| X3                        | -2.4813            | 1.726          | -1.438  | 0.178   |
| X4                        | 0.7275             | 1.398          | 0.520   | 0.613   |
| <b>Interaction effect</b> |                    |                |         |         |
| X1*X2                     | -13.7758           | 2.501          | -5.508  | 0.000   |
| X1*X3                     | -3.9967            | 2.501          | -1.598  | 0.138   |
| X1*X4                     | -0.0102            | 1.891          | -0.005  | 0.996   |
| X2*X3                     | -3.0242            | 2.501          | -1.209  | 0.252   |
| X2*X4                     | 5.7040             | 1.891          | 3.017   | 0.012   |
| X3*X4                     | 1.6229             | 1.891          | 0.858   | 0.409   |
| <b>Quadratic effect</b>   |                    |                |         |         |
| X1                        | -3.6893            | 2.395          | -1.541  | 0.152   |
| X2                        | -5.3160            | 2.395          | -2.220  | 0.048   |
| X3                        | 0.5803             | 2.395          | 0.242   | 0.813   |
| X4                        | 0.0336             | 2.475          | 0.014   | 0.989   |

*R-Squared*= 0.879

**Supplementary Table 3:** Response surface methodology results for RNA Integrity ( % full length RNA) based on polynomial Ordinary Least Square (OLS) regression

| Variable                   | Parameter Estimate | Standard Error | t-value | p-value |
|----------------------------|--------------------|----------------|---------|---------|
| <b>Intercept</b>           | 45.8062            | 2.861          | 16.013  | 0.000   |
| <b>Main effects</b>        |                    |                |         |         |
| X1                         | -0.9593            | 1.766          | -0.543  | 0.598   |
| X2                         | -3.8496            | 1.766          | -2.180  | 0.052   |
| X3                         | 2.3008             | 1.766          | 1.303   | 0.219   |
| X4                         | -1.1650            | 1.430          | -0.815  | 0.433   |
| <b>Interaction effects</b> |                    |                |         |         |
| X1*X2                      | 2.9929             | 2.559          | 1.170   | 0.267   |
| X1*X3                      | 2.1292             | 2.559          | 0.832   | 0.423   |
| X1*X4                      | -2.1008            | 1.934          | -1.086  | 0.301   |
| X2*X3                      | 3.3162             | 2.559          | 1.296   | 0.221   |
| X2*X4                      | 0.2006             | 1.934          | 0.104   | 0.919   |
| X3*X4                      | -0.6469            | 1.934          | -0.334  | 0.744   |
| <b>Quadratic effects</b>   |                    |                |         |         |
| X1                         | 2.4018             | 2.450          | 0.980   | 0.348   |
| X2                         | -6.8972            | 2.450          | -2.816  | 0.017   |
| X3                         | -4.2024            | 2.450          | -1.716  | 0.114   |
| X4                         | -3.0632            | 2.532          | -1.210  | 0.252   |

*R-Squared=0.758*

**Supplementary Table 4:** Response surface methodology results for “Full length RNA per particle” based on polynomial Ordinary Least Square (OLS) regression

| Variable                   | Parameter Estimate | Standard Error | t-value | p-value |
|----------------------------|--------------------|----------------|---------|---------|
| <b>Intercept</b>           | 56.0833            | 7.056          | 7.948   | 0.000   |
| <b>Main effects</b>        |                    |                |         |         |
| X1                         | -0.1529            | 4.355          | -0.035  | 0.973   |
| X2                         | -14.0226           | 4.355          | -3.220  | 0.008   |
| X3                         | -0.8585            | 4.355          | -0.197  | 0.847   |
| X4                         | -3.7913            | 3.528          | -1.075  | 0.306   |
| <b>Interaction effects</b> |                    |                |         |         |
| X1*X2                      | 2.8640             | 6.311          | 0.454   | 0.659   |
| X1*X3                      | -9.7236            | 6.311          | -1.541  | 0.152   |
| X1*X4                      | -4.5379            | 4.771          | -0.951  | 0.362   |
| X2*X3                      | -3.0584            | 6.311          | -0.485  | 0.637   |
| X2*X4                      | -0.9230            | 4.771          | -0.193  | 0.850   |
| X3*X4                      | -6.6659            | 4.771          | -1.397  | 0.190   |
| <b>Quadratic effects</b>   |                    |                |         |         |
| X1                         | 1.8821             | 6.042          | 0.311   | 0.761   |
| X2                         | -10.3653           | 6.042          | -1.715  | 0.114   |
| X3                         | -4.0833            | 6.042          | -0.676  | 0.513   |
| X4                         | -14.5125           | 6.245          | -2.324  | 0.040   |

*R-Squared=0.744*



**Supplementary Table 5:** Response surface methodology results for IL-6 cytokine release (pg/mL) based on polynomial Ordinary Least Square (OLS) regression

| <b>Variable</b>            | <b>Parameter Estimate</b> | <b>Standard Error</b> | <b>t-value</b> | <b>p-value</b> |
|----------------------------|---------------------------|-----------------------|----------------|----------------|
| <b>Intercept</b>           | 1070.7424                 | 128.432               | 8.337          | 0.000          |
| <b>Main effects</b>        |                           |                       |                |                |
| X1                         | 13.3994                   | 79.270                | 0.169          | 0.869          |
| X2                         | 234.2870                  | 79.270                | 2.956          | 0.013          |
| X3                         | -14.7627                  | 79.270                | -0.186         | 0.856          |
| X4                         | 203.5250                  | 64.216                | 3.169          | 0.009          |
| <b>Interaction effects</b> |                           |                       |                |                |
| X1*X2                      | 64.9717                   | 114.873               | 0.566          | 0.583          |
| X1*X3                      | -6.0020                   | 114.873               | - 0.052        | 0.959          |
| X1*X4                      | 31.1357                   | 86.836                | 0.359          | 0.727          |
| X2*X3                      | 38.0080                   | 114.873               | 0.331          | 0.747          |
| X2*X4                      | -57.0024                  | 86.836                | -0.656         | 0.525          |
| X3*X4                      | 3.1393                    | 86.836                | 0.036          | 0.972          |
| <b>Quadratic effects</b>   |                           |                       |                |                |
| X1                         | -13.0994                  | 109.983               | - 0.119        | 0.907          |
| X2                         | -26.6679                  | 109.983               | - 0.242        | 0.813          |
| X3                         | -310.8027                 | 109.983               | -2.826         | 0.016          |
| X4                         | 171.9190                  | 113.670               | 1.512          | 0.159          |

*R-Squared=0.808; Prob (F-statistic): 0.0264*

**Supplementary Table 6 :** Response surface methodology results for protein expression (RLU) based on polynomial Ordinary Least Square (OLS) regression.

| <b>Variable</b>            | <b>Parameter Estimate</b> | <b>Standard Error</b> | <b>t-value</b> | <b>p-value</b> |
|----------------------------|---------------------------|-----------------------|----------------|----------------|
| <b>Intercept</b>           | 1.376e+07                 | 1.74e+06              | 7.918          | 0.000          |
| <b>Main effects</b>        |                           |                       |                |                |
| X1                         | 3.267e+06                 | 1.2e+06               | 2.723          | 0.034          |
| X2                         | 4.816e+06                 | 1.2e+06               | 4.015          | 0.007          |
| X3                         | 1.557e+06                 | 1.2e+06               | 1.298          | 0.242          |
| X4                         | -1.982e+06                | 8.48e+05              | -2.336         | 0.058          |
| <b>Interaction effects</b> |                           |                       |                |                |
| X1*X2                      | 1.996e+06                 | 1.52e+06              | 1.316          | 0.236          |
| X1*X3                      | -1.523e+06                | 1.52e+06              | -1.004         | 0.354          |
| X1*X4                      | 2.469e+06                 | 1.2e+06               | 2.058          | 0.085          |
| X2*X3                      | 2.445e+05                 | 1.52e+06              | 0.161          | 0.877          |
| X2*X4                      | 8.263e+05                 | 1.54e+06              | 0.537          | 0.610          |
| X3*X4                      | 1.574e+06                 | 1.2e+06               | 1.312          | 0.237          |
| <b>Quadratic effects</b>   |                           |                       |                |                |
| X1                         | 2.795e+06                 | 1.54e+06              | 1.817          | 0.119          |
| X2                         | -8.166e+06                | 1.54e+06              | -5.309         | 0.002          |
| X3                         | -1.97e+06                 | 1.2e+06               | -1.642         | 0.152          |

*R-Squared=0.946 ; Prob (F-statistic): 0.00884*

**Supplementary Table 7:** List of all formulation variations explored for Iteration A.

| ID   | N/P | Phospholipid Type | Phospholipid (mol %) | DMG-PEG-2000 (mol%) | Ionizable Lipid Type | Ionizable Lipid (mol %) | Total Flow Rate (mL/min) | Temperature (°C) | Aqueous Buffer pH | RNA Type |
|------|-----|-------------------|----------------------|---------------------|----------------------|-------------------------|--------------------------|------------------|-------------------|----------|
| A-1  | 10  | DOPE              | 10                   | 0                   | MC3                  | 30                      | 2                        | 4                | 3                 | saRNA    |
| A-2  | 5   | DSPC              | 15                   | 0                   | SM-102               | 30                      | 2                        | 4                | 7                 | mRNA     |
| A-3  | 15  | DOPE              | 20                   | 2.5                 | SM-102               | 30                      | 2                        | 4                | 7                 | mRNA     |
| A-4  | 5   | DSPC              | 20                   | 1.25                | MC3                  | 50                      | 2                        | 4                | 3                 | mRNA     |
| A-5  | 15  | DSPC              | 10                   | 2.5                 | SM-102               | 50                      | 2                        | 4                | 3                 | saRNA    |
| A-6  | 5   | DOPE              | 20                   | 2.5                 | MC3                  | 50                      | 9                        | 4                | 7                 | saRNA    |
| A-7  | 15  | DSPC              | 20                   | 0                   | MC3                  | 30                      | 16                       | 4                | 5                 | saRNA    |
| A-8  | 5   | DOPE              | 10                   | 2.5                 | ALC-0315             | 30                      | 16                       | 4                | 3                 | mRNA     |
| A-9  | 15  | DSPC              | 10                   | 2.5                 | MC3                  | 40                      | 16                       | 4                | 7                 | mRNA     |
| A-10 | 5   | DOPE              | 10                   | 0                   | SM-102               | 50                      | 16                       | 4                | 7                 | saRNA    |
| A-11 | 15  | DOPE              | 20                   | 0                   | SM-102               | 50                      | 16                       | 4                | 3                 | mRNA     |
| A-12 | 15  | DOPE              | 10                   | 0                   | MC3                  | 50                      | 2                        | 20               | 7                 | mRNA     |
| A-13 | 10  | DOPE              | 15                   | 1.25                | ALC-0315             | 40                      | 9                        | 20               | 5                 | saRNA    |
| A-14 | 10  | DSPC              | 15                   | 1.25                | ALC-0315             | 40                      | 9                        | 20               | 5                 | mRNA     |
| A-15 | 5   | DSPC              | 20                   | 2.5                 | SM-102               | 30                      | 16                       | 20               | 3                 | saRNA    |
| A-16 | 5   | DSPC              | 10                   | 2.5                 | MC3                  | 30                      | 2                        | 36               | 7                 | saRNA    |
| A-17 | 15  | DSPC              | 20                   | 2.5                 | MC3                  | 30                      | 2                        | 36               | 3                 | mRNA     |
| A-18 | 5   | DOPE              | 20                   | 0                   | SM-102               | 40                      | 2                        | 36               | 3                 | saRNA    |
| A-19 | 15  | DSPC              | 20                   | 0                   | ALC-0315             | 50                      | 2                        | 36               | 7                 | saRNA    |
| A-20 | 5   | DOPE              | 10                   | 2.5                 | SM-102               | 50                      | 2                        | 36               | 5                 | mRNA     |
| A-21 | 15  | DSPC              | 10                   | 0                   | SM-102               | 30                      | 9                        | 36               | 3                 | mRNA     |
| A-22 | 5   | DOPE              | 20                   | 0                   | MC3                  | 30                      | 16                       | 36               | 7                 | mRNA     |
| A-23 | 15  | DOPE              | 10                   | 1.25                | SM-102               | 30                      | 16                       | 36               | 7                 | saRNA    |
| A-24 | 5   | DSPC              | 10                   | 0                   | MC3                  | 50                      | 16                       | 36               | 3                 | saRNA    |
| A-25 | 15  | DOPE              | 15                   | 2.5                 | MC3                  | 50                      | 16                       | 36               | 3                 | saRNA    |
| A-26 | 10  | DSPC              | 20                   | 2.5                 | SM-102               | 50                      | 16                       | 36               | 7                 | mRNA     |

**Supplementary Table 8.** List of all formulation variations explored for Iteration B.

| ID   | N/P | Phospholipid Type | Phospholipid (mol %) | DMG-PEG-2000 (mol%) | Ionizable Lipid Type | Ionizable Lipid (mol %) | Total Flow Rate (mL/min) | Temperature (°C) | Aqueous Buffer pH | RNA Type |
|------|-----|-------------------|----------------------|---------------------|----------------------|-------------------------|--------------------------|------------------|-------------------|----------|
| B-1  | 10  | DOPE              | 12.5                 | 1.25                | ALC-0315             | 40                      | 16                       | 20               | 4                 | saRNA    |
| B-2  | 10  | DOPE              | 17.5                 | 1.25                | ALC-0315             | 40                      | 16                       | 20               | 4                 | saRNA    |
| B-3  | 10  | DOPE              | 15                   | 1.25                | MC3                  | 40                      | 16                       | 20               | 4                 | saRNA    |
| B-4  | 10  | DOPE              | 15                   | 1.25                | SM-102               | 40                      | 16                       | 20               | 4                 | saRNA    |
| B-5  | 10  | DOPE              | 15                   | 1.25                | ALC-0315             | 35                      | 16                       | 20               | 4                 | saRNA    |
| B-6  | 10  | DOPE              | 15                   | 1.25                | ALC-0315             | 45                      | 16                       | 20               | 4                 | saRNA    |
| B-7  | 10  | DOPE              | 12.5                 | 1.25                | MC3                  | 40                      | 16                       | 20               | 5                 | saRNA    |
| B-8  | 10  | DOPE              | 17.5                 | 1.25                | MC3                  | 40                      | 16                       | 20               | 5                 | saRNA    |
| B-9  | 10  | DOPE              | 12.5                 | 1.25                | SM-102               | 40                      | 16                       | 20               | 5                 | saRNA    |
| B-10 | 10  | DOPE              | 17.5                 | 1.25                | SM-102               | 40                      | 16                       | 20               | 5                 | saRNA    |
| B-11 | 10  | DOPE              | 12.5                 | 1.25                | ALC-0315             | 35                      | 16                       | 20               | 5                 | saRNA    |
| B-12 | 10  | DOPE              | 17.5                 | 1.25                | ALC-0315             | 35                      | 16                       | 20               | 5                 | saRNA    |
| B-13 | 10  | DOPE              | 12.5                 | 1.25                | ALC-0315             | 45                      | 16                       | 20               | 5                 | saRNA    |
| B-14 | 10  | DOPE              | 17.5                 | 1.25                | ALC-0315             | 45                      | 16                       | 20               | 5                 | saRNA    |
| B-15 | 10  | DOPE              | 15                   | 1.25                | MC3                  | 35                      | 16                       | 20               | 5                 | saRNA    |
| B-16 | 10  | DOPE              | 15                   | 1.25                | SM-102               | 35                      | 16                       | 20               | 5                 | saRNA    |
| B-17 | 10  | DOPE              | 15                   | 1.25                | MC3                  | 45                      | 16                       | 20               | 5                 | saRNA    |
| B-18 | 10  | DOPE              | 15                   | 1.25                | SM-102               | 45                      | 16                       | 20               | 5                 | saRNA    |
| B-19 | 10  | DOPE              | 15                   | 1.25                | ALC-0315             | 40                      | 16                       | 20               | 5                 | saRNA    |
| B-20 | 10  | DOPE              | 15                   | 1.25                | ALC-0315             | 40                      | 16                       | 20               | 5                 | saRNA    |
| B-21 | 10  | DOPE              | 12.5                 | 1.25                | ALC-0315             | 40                      | 16                       | 20               | 6                 | saRNA    |
| B-22 | 10  | DOPE              | 17.5                 | 1.25                | ALC-0315             | 40                      | 16                       | 20               | 6                 | saRNA    |
| B-23 | 10  | DOPE              | 15                   | 1.25                | MC3                  | 40                      | 16                       | 20               | 6                 | saRNA    |
| B-24 | 10  | DOPE              | 15                   | 1.25                | SM-102               | 40                      | 16                       | 20               | 6                 | saRNA    |
| B-25 | 10  | DOPE              | 15                   | 1.25                | ALC-0315             | 35                      | 16                       | 20               | 6                 | saRNA    |
| B-26 | 10  | DOPE              | 15                   | 1.25                | ALC-0315             | 45                      | 16                       | 20               | 6                 | saRNA    |

**Supplementary Table 9.** List of all formulation variations used to validate the optimized LNP formulations.

| <b>ID</b> | <b>N/P</b> | <b>Phospholipid Type</b> | <b>Phospholipid (mol %)</b> | <b>DMG-PEG-2000 (mol%)</b> | <b>Ionizable Lipid Type</b> | <b>Ionizable Lipid (mol %)</b> | <b>Total Flow Rate (mL/min)</b> | <b>Temperature (°C)</b> | <b>Aqueous Buffer pH</b> | <b>RNA Type</b> |
|-----------|------------|--------------------------|-----------------------------|----------------------------|-----------------------------|--------------------------------|---------------------------------|-------------------------|--------------------------|-----------------|
| 1-M       | 10         | DOPE                     | 15.9                        | 1.25                       | ALC-0315                    | 45                             | 16                              | 20                      | 4.53                     | mRNA            |
| 1-S       | 10         | DOPE                     | 15.9                        | 1.25                       | ALC-0315                    | 45                             | 16                              | 20                      | 4.53                     | saRNA           |
| 2-M       | 10         | DOPE                     | 17.5                        | 1.25                       | SM-102                      | 45                             | 16                              | 20                      | 6                        | mRNA            |
| 2-S       | 10         | DOPE                     | 17.5                        | 1.25                       | SM-102                      | 45                             | 16                              | 20                      | 6                        | saRNA           |
| 3-M       | 10         | DOPE                     | 17.5                        | 1.25                       | ALC-0315                    | 35                             | 16                              | 20                      | 5.25                     | mRNA            |
| 3-S       | 10         | DOPE                     | 17.5                        | 1.25                       | ALC-0315                    | 35                             | 16                              | 20                      | 5.25                     | saRNA           |
